# Supplementary material
Source: publisher figshare collection journal article supplement (https://tandf.figshare.com/ndownloader/files/17616767)

# Supplementary Information

**Ligand complex of copper(II) supported on superparamagnetic Fe3O4@SiO2 nanoparticles: an efficient and magnetically separable catalyst for *N*-arylation of nitrogen-containing heterocycles with aryl halides**

Saeed Zahmatkesh,*a Mohsen Esmaeilpour,*b Azade Mollaiy polic

aDepartment of Science, Payame Noor University (PNU), 19395-4697, Tehran, Islamic Republic of Iran

bChemistry Department, College of Science, Shiraz University, Shiraz, Iran

cDepartment of Chemistry, Payame Noor University, Estahban, Iran

*Corresponding author. Tel.: +98 7116137738, fax: +98 7112286008.

E-mail address: [zahmatkesh1355@yahoo.com](mailto:zahmatkesh1355@yahoo.com) (S. Zahmatkesh); [m1250m551085@yahoo. com](mailto:m1250m551085@yahoo.com) (M. Esmaeilpour)

**Selected spectral data**

**1-Phenyl-1*H*-imidazole (Table 2, entry 1)**

Dark brown oil, 1H NMR (250 MHz, CDCl3): *δ*= 7.14-7.45 (m, 7 H), 7.80 (s, 1 H); 13C NMR (62.9 MHz, CDCl3): *δ*= 118.2, 121.4, 127.5, 129.9, 130.4, 135.5, 137.4.

**1-Phenyl-1*H*-indole (Table 2, entry 4)**

Dark brown oil, 1H NMR (250 MHz, CDCl3): *δ*= 6.59-6.63 (m, 1 H), 7.06–7.17 (m, 2 H), 7.25-7.30 (m, 2 H), 7.41-7.52 (m, 5 H), 7.59-7.64 (m, 1 H); 13C NMR (62.9 MHz, CDCl3): *δ*= 103.6, 110.5, 120.4, 121.1, 122.4, 124.4, 126.4, 128.0, 129.3, 129.6, 135.8, 139.8; Anal. Calcd for C14H11N: C, 87.01; H, 5.75; N 7.25%. Found: C, 86.87; H, 5.89; N, 7.24%.

**1-*p*-Tolyl-1*H*-indole (Table 2, entry 5)**

Dark brown oil, 1H NMR (250 MHz, CDCl3): *δ*= 2.35 (s, 3 H), 6.58 (dd, *J*= 4.2 Hz, 1 H),

7.04-7.32 (m, 7 H), 7.43-7.47 (m, 1 H), 7.58-7.62 (m, 1 H); 13C NMR (62.9 MHz, CDCl3): *δ*= 21.1, 103.2, 110.5, 120.1, 121.1, 122.2, 124.3, 128.1, 129.2, 130.1, 136.3, 137.3; Anal. Calcd for C15H13N: C, 86.92; H, 6.32; N, 6.76%. Found: C, 86.66; H, 6.48; N, 6.86%.

**2-Methyl-1-phenyl-1*H*-indole (Table 2, entry 6)**

Dark brown oil, 1H NMR (250 MHz, CDCl3): *δ*= 2.22 (s, 3 H), 6.32 (s, 1 H), 7.00-7.07 (m, 3 H), 7.25-7.29 (m, 2 H), 7.36-7.51 (m, 4 H); 13C NMR (62.9 MHz, CDCl3): *δ*= 13.4, 101.3, 110.0, 119.6, 120.0, 121.0, 127.7, 128.0, 128.2, 129.4, 137.0, 138.2; Anal. Calcd for C15H13N: C, 86.92; H, 6.32; N, 6.76%. Found: C, 86.69; H, 6.42; N, 6.89%.

**1-Phenyl-1*H*-benzimidazole (Table 2, entry 7)**

Brown oil, 1H NMR (250 MHz, CDCl3): *δ*= 7.32-7.36 (m, 2 H), 7.44-7.61 (m, 6 H),

7.89-7.90 (m, 1 H), 8.17 (s, 1 H); 13C NMR (62.9 MHz, CDCl3): *δ*= 110.5, 120.6, 122.8, 123.7, 124.0, 128.0, 130.0, 136.3, 142.8, 144.2; Anal. Calcd for C13H10N2: C, 80.39; H, 5.19; N, 14.42%. Found: C, 80.58; H, 5.03; N, 14.39%.

**1-Pyridin-2-yl-1*H*-benzimidazole (Table 2, entry 8)**

Brown oil, 1H NMR (250 MHz, CDCl3): *δ*= 7.26-7.39 (m, 3 H), 7.58 (d, *J*= 8.2 Hz, 1 H), 7.86-7.93 (m, 2 H), 8.06 (d, *J*= 7.8 Hz, 1 H), 8.58-8.62 (m, 2 H); 13C NMR (62.9 MHz, CDCl3): *δ*= 112.6, 114.3, 120.6, 121.8, 123.3, 124.2, 132.1, 138.9, 141.3, 144.7, 149.5, 149.9; Anal. Calcd for C12H9N3: C, 73.83; H, 4.65; N, 21.52%. Found: C, 73.56; H, 4.73; N, 21.71%.

**1,4-Diphenylpiperazine (Table 2, entry 10)**

Dark brown solid, mp 150-151°C, 1H NMR (250 MHz, CDCl3): *δ*= 3.36 (s, 8 H), 6.88-7.02 (m, 6 H), 7.28-7.34 (m, 4 H); 13C NMR (62.9 MHz, CDCl3): *δ*= 49.5, 116.4, 120.1, 129.2, 151.3; Anal. Calcd for C16H18N2: C, 80.63; H, 7.61; N, 11.75%. Found: C, 80.84; H, 7.55; N, 11.61%.

**1-Phenyl-4-pyridin-2-ylpiperazine (Table 2, entry 11)**

Light brown solid, mp 101-102 °C, 1H NMR (250 MHz, CDCl3): *δ*= 3.24 (dd, *J1*= 7.0 Hz, *J*2= 5.0 Hz, 4 H), 3.64 (t, *J*= 5.2 Hz, 4 H), 6.56-6.65 (m, 2 H), 6.79-6.93 (m, 3H), 7.18-7.25 (m, 2 H), 7.40-7.47 (m, 1 H), 8.14-8.16 (m, 1 H); 13C NMR (62.9 MHz, CDCl3): *δ*= 45.3, 49.2, 107.2, 113.6, 116.3, 120.1, 129.2, 137.6, 148.0, 151.3, 159.4; Anal. Calcd for C15H17N3: C, 75.28; H, 7.16; N, 17.56%. Found: C, 75.44; H, 7.11; N, 17.45%.

**2-Imidazol-1-ylpyridine (Table 2, entry 14)**

Dark brown oil, 1H NMR (250 MHz, CDCl3): *δ*= 7.14-720 (m, 2 H), 7.28-7.34 (m, 1 H), 7.25-7.34 (m, 1 H), 7.58 (s, 1 H), 7.73-7.80 (m, 1 H), 8.28 (s, 1 H), 8.41-8.43 (m, 1 H);13C NMR (62.9 MHz, CDCl3): *δ*= 112.3, 116.7, 122.0, 130.6, 132.2, 134.9, 139.0, 149.1; Anal. Calcd for C8H7N3: C, 66.19; H, 4.86; N, 28.95%. Found: C, 65.99; H, 4.81; N, 29.20%.


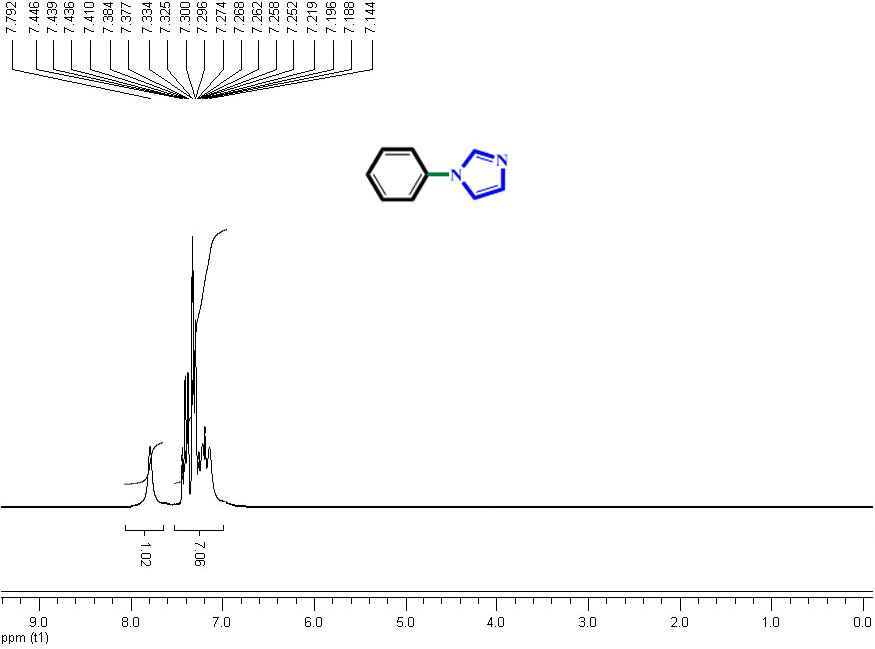


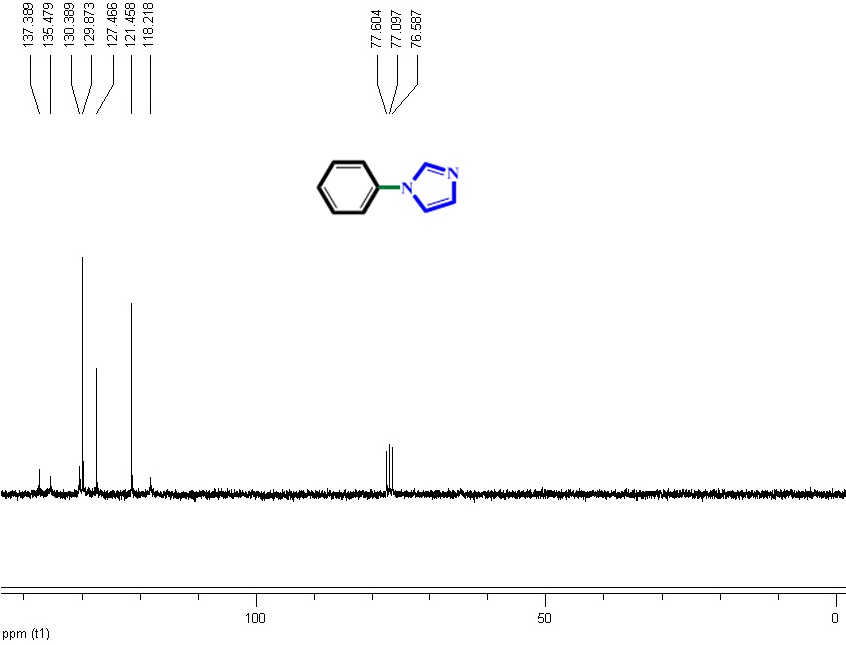


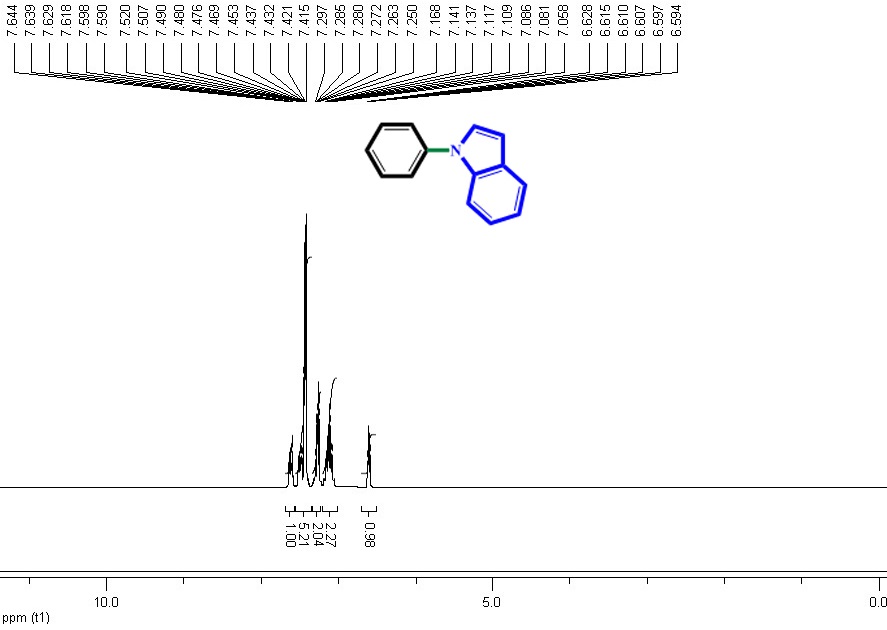


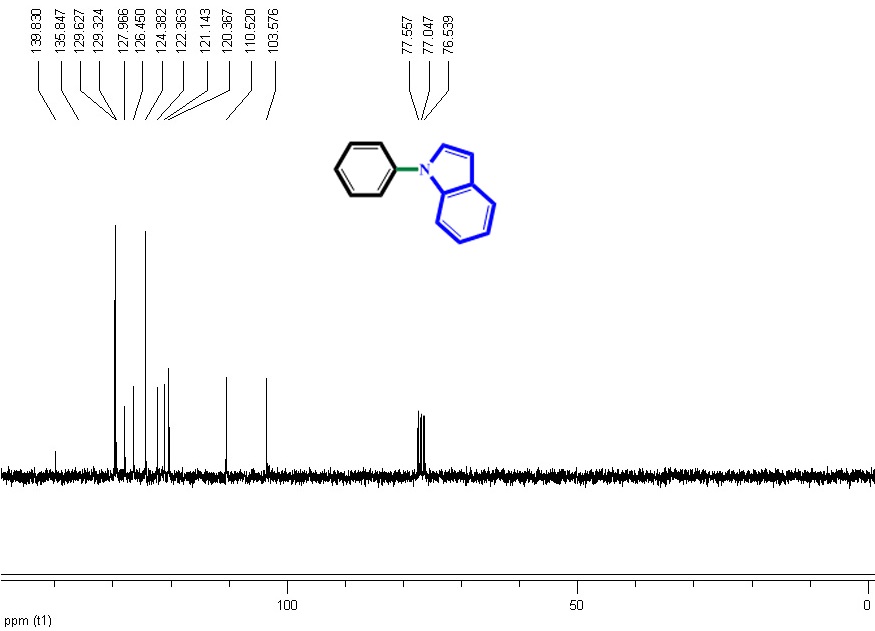


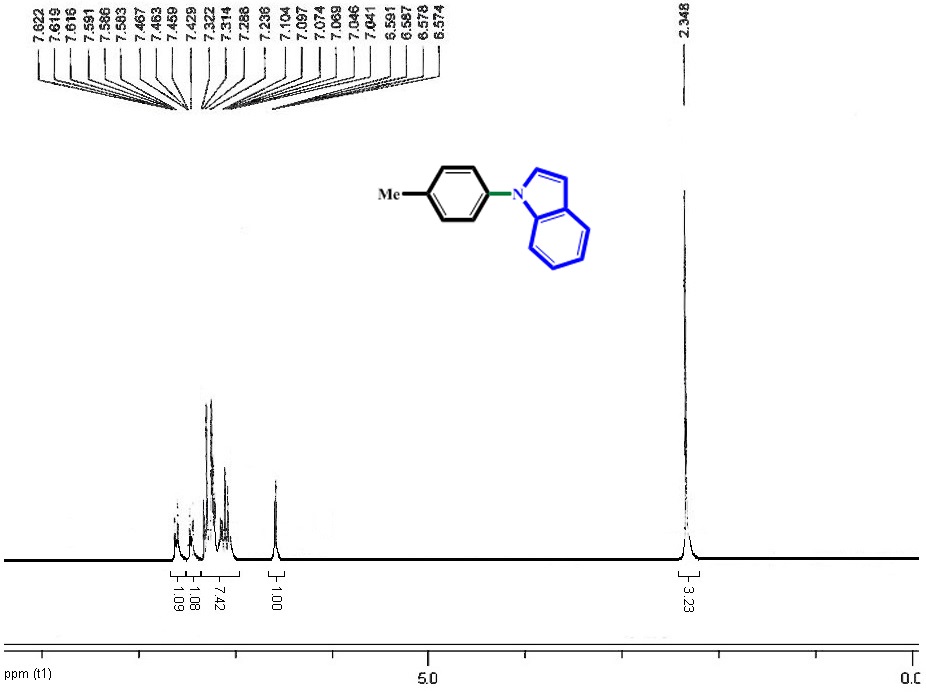


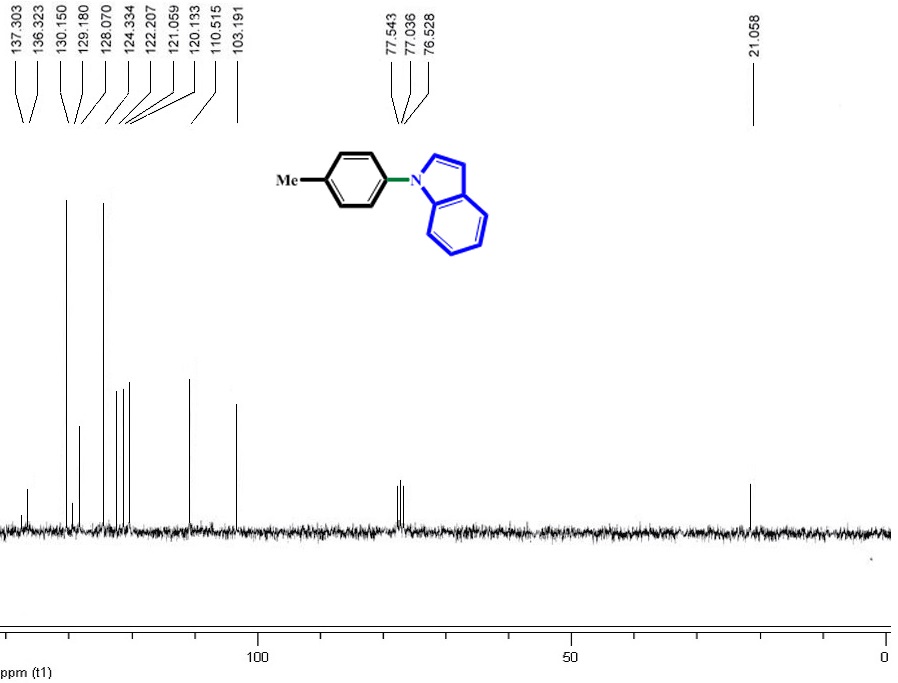


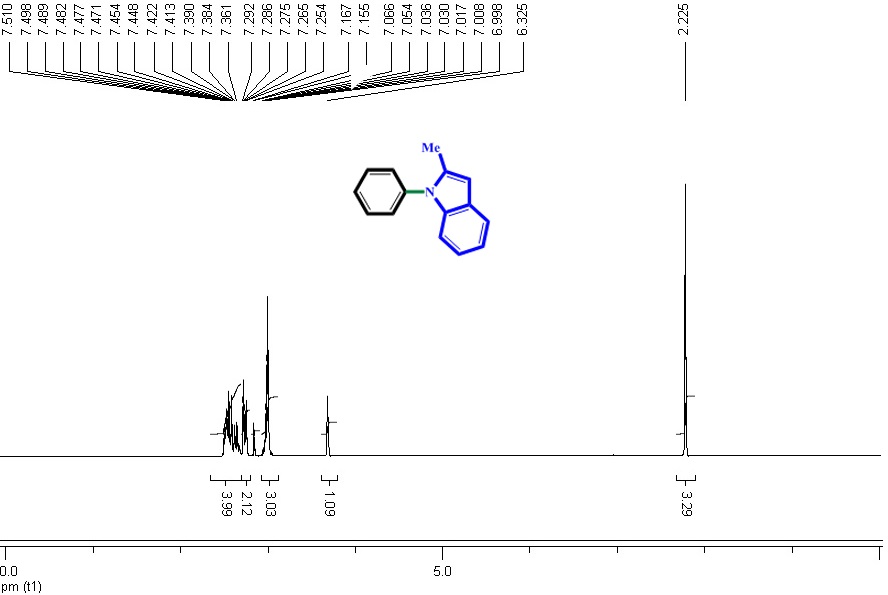


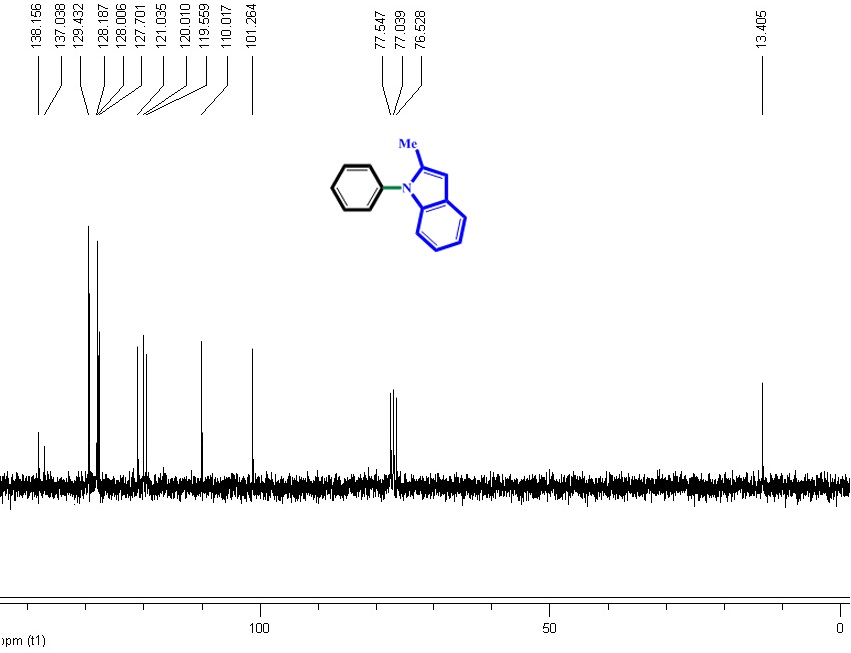


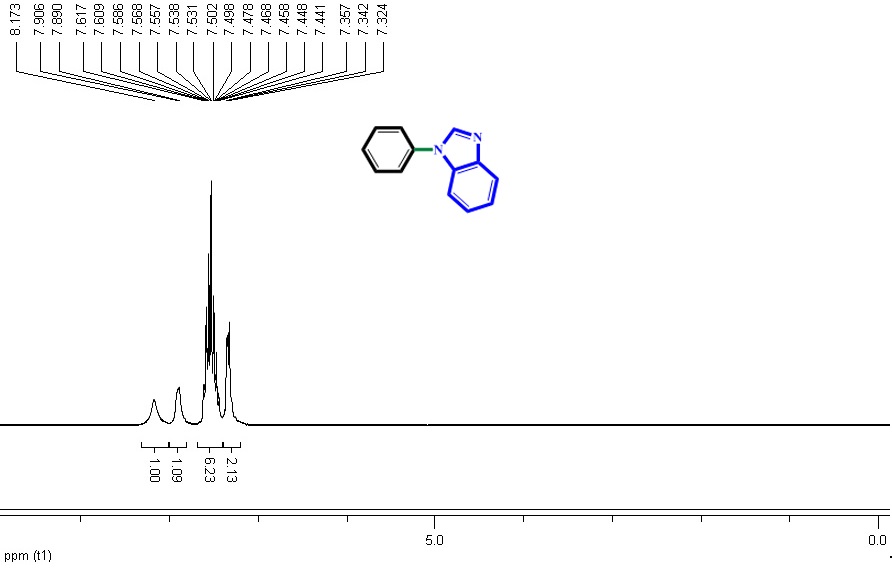


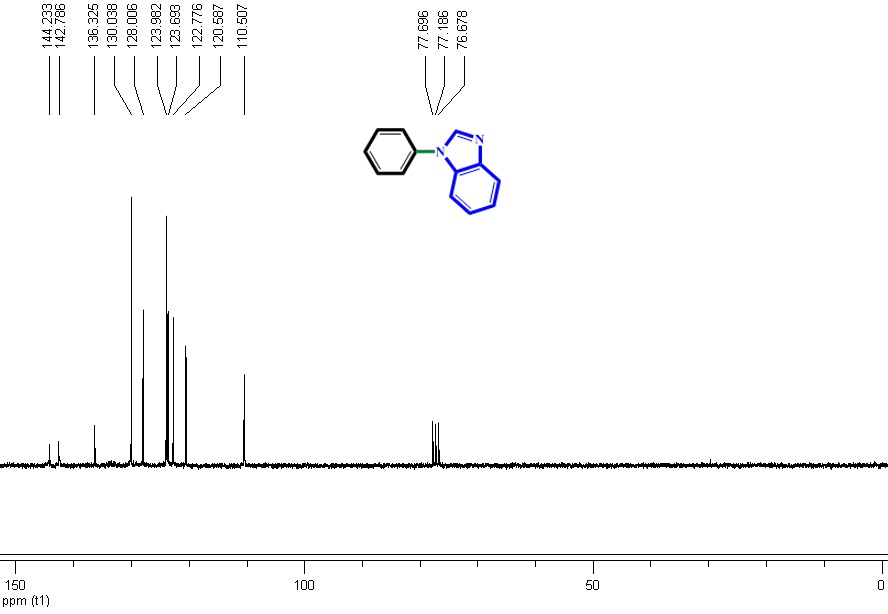


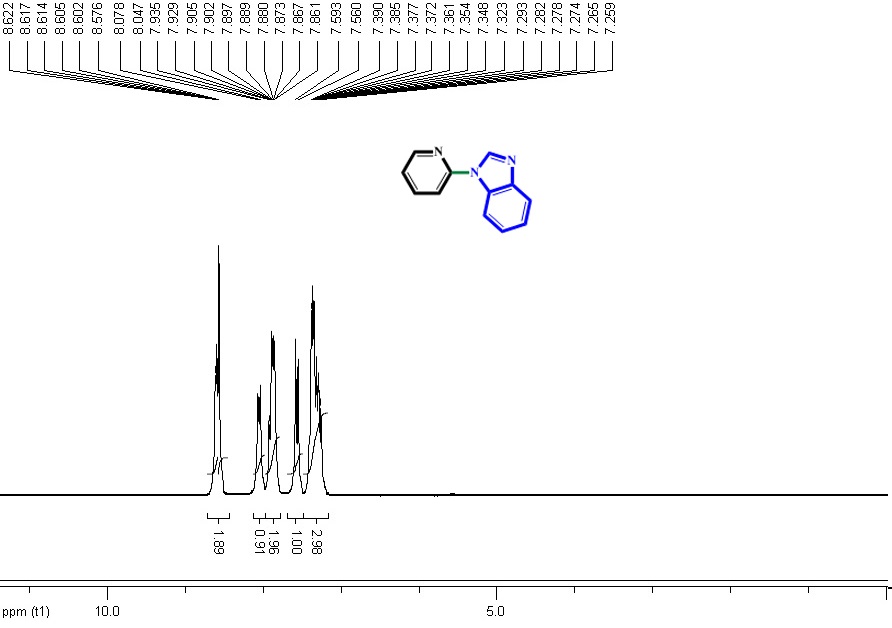


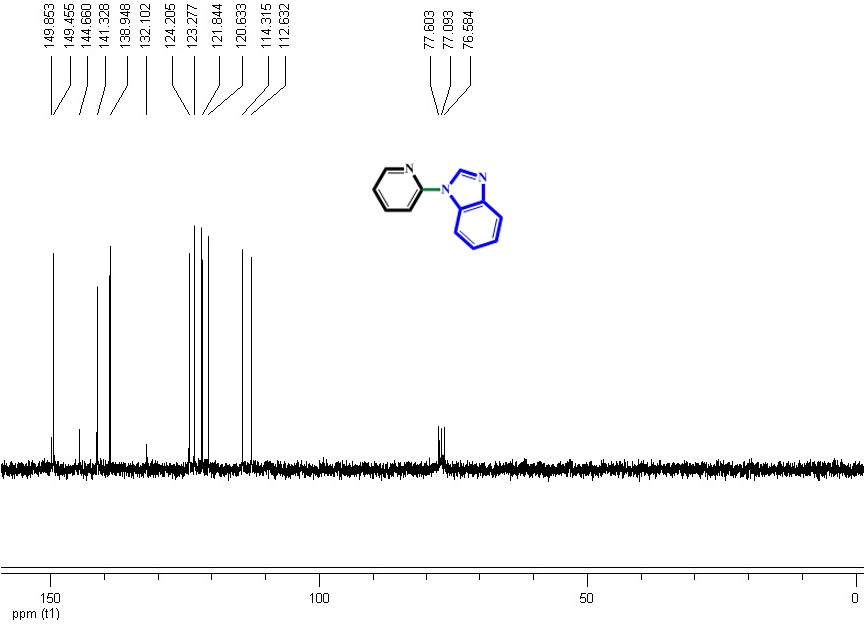


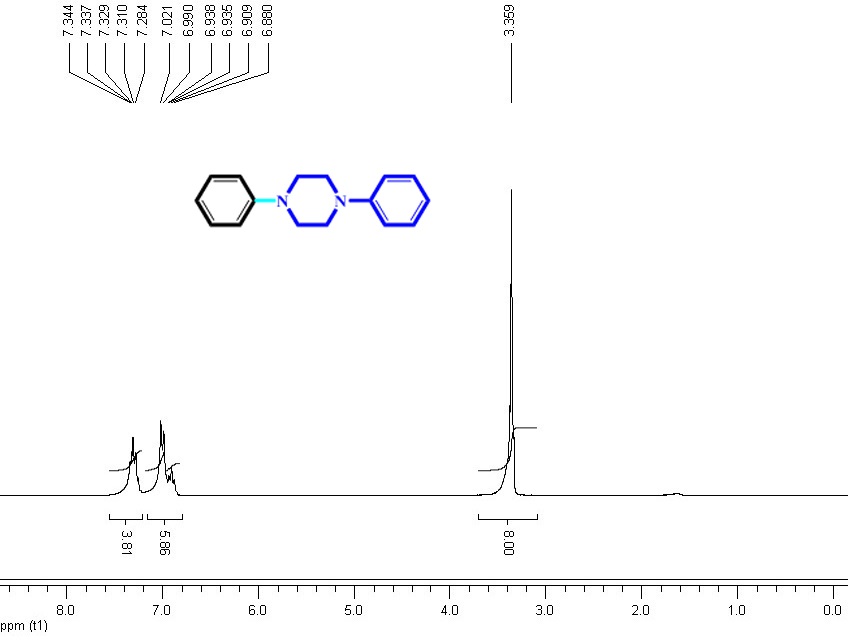


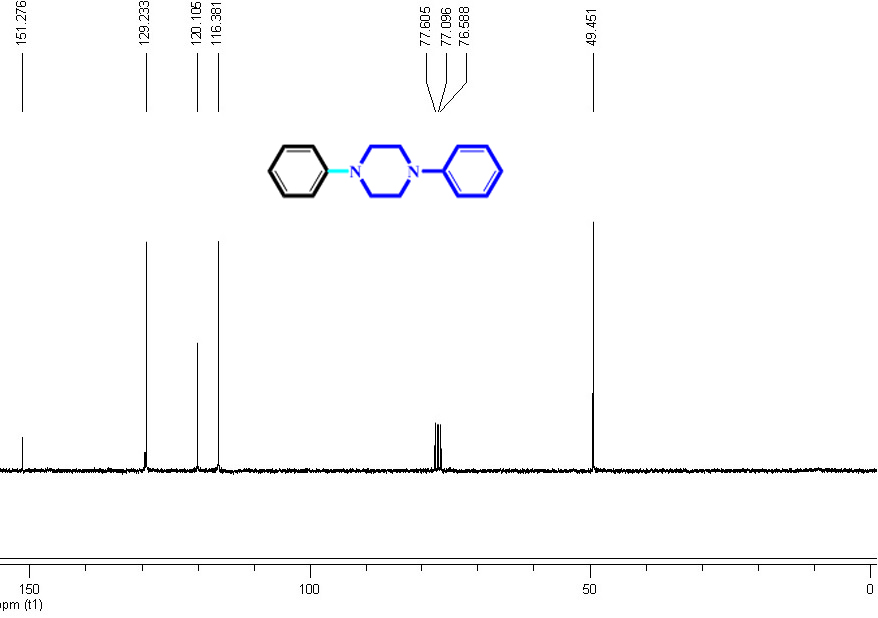


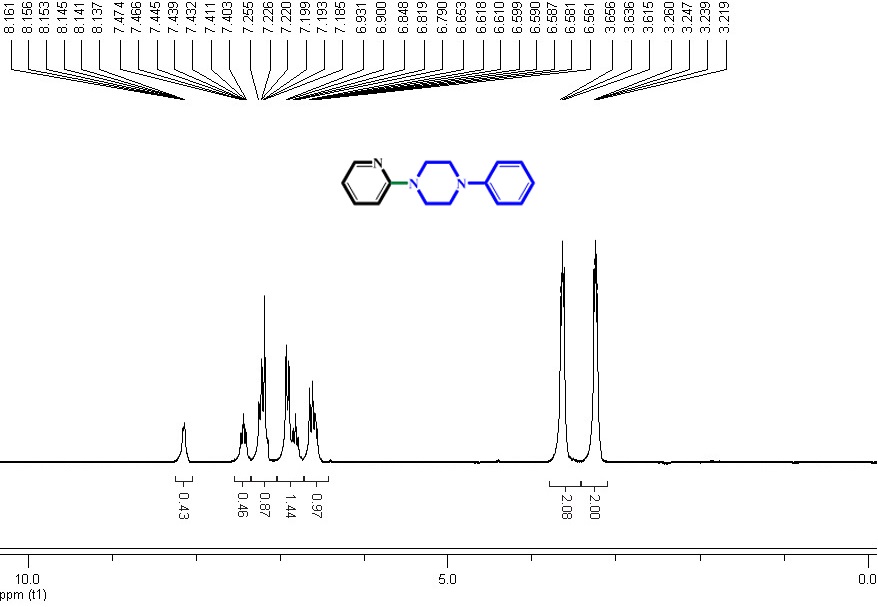


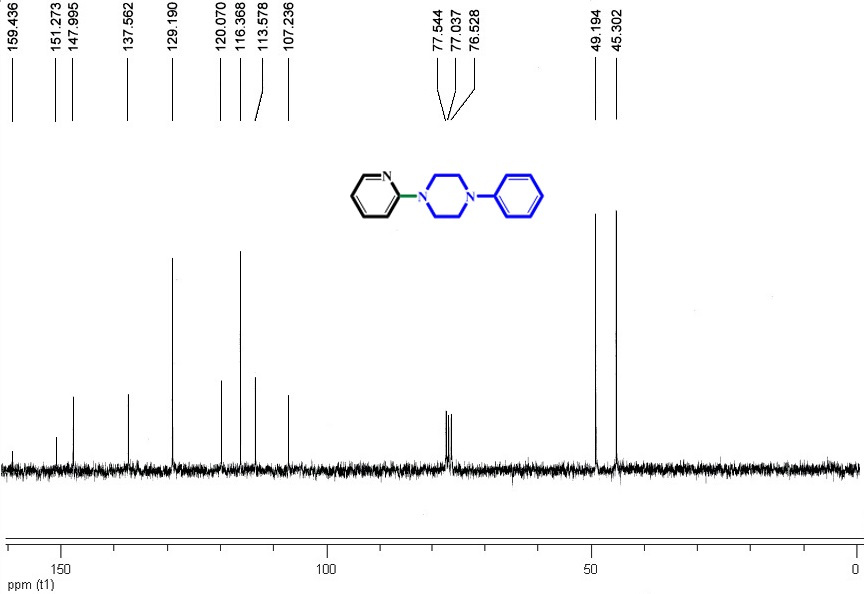


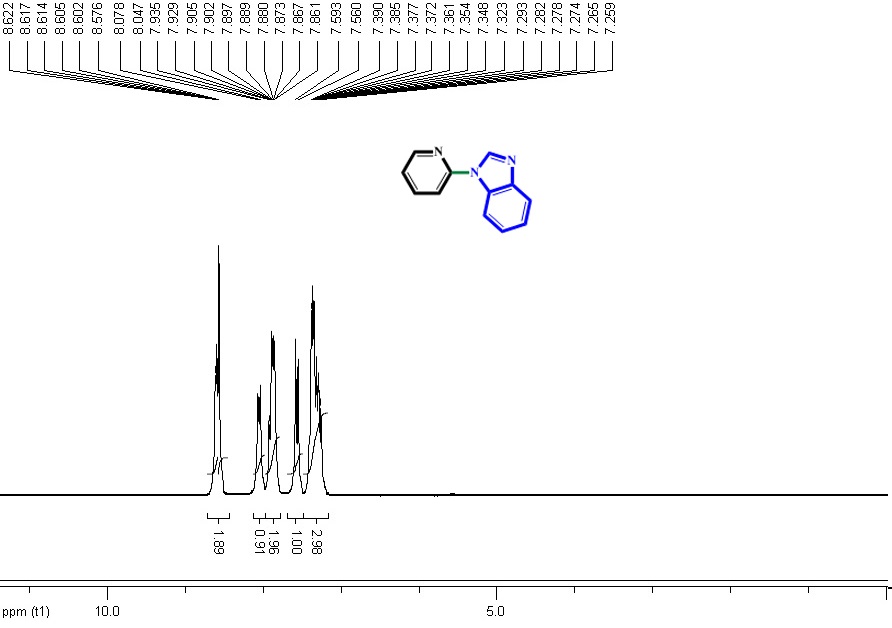


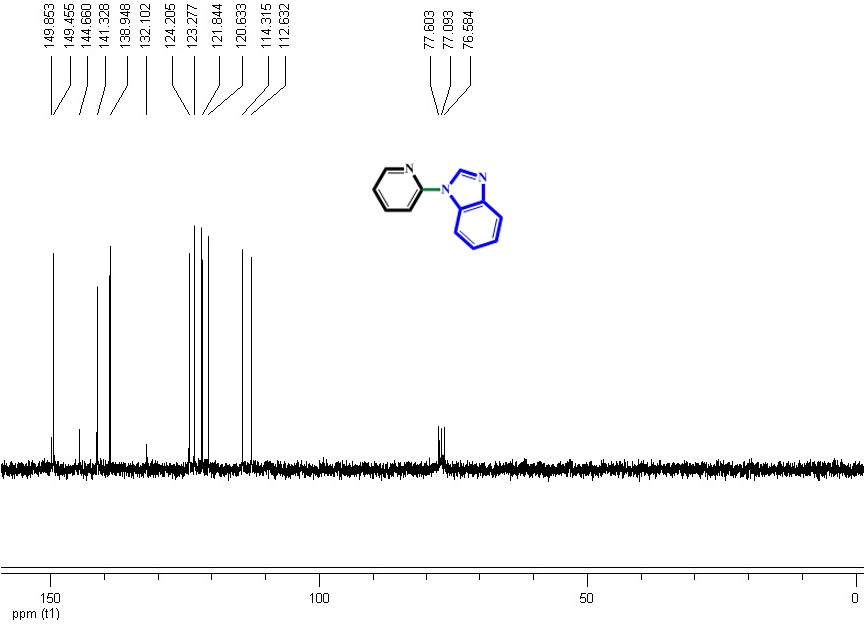

Supplement: Supplementary file 1 [file 17616767]
